# Supplementary material for: Preparation of TCPP: block copolymer composites and study of their memory behavior by tuning the loading ratio of TCPP in the polymer matrix
Source: Royal Society of Chemistry journal article supplement (doi:10.1039/c3tc30359d), 2013-01-01
Supplement: c3tc30359d.pdf [file c3tc30359d.pdf]

## Supporting Information

### Preparation of TCPP: block copolymer composites and study of their memory behavior by tuning loading ratio of TCPP in polymer matrix

Juan Liu,<sup>a</sup> Peiyang Gu,<sup>a</sup> Feng Zhou,<sup>a</sup> Qingfeng Xu,<sup>\*a,b</sup> Jianmei Lu,<sup>\*a,b</sup> Hua Li,<sup>a,b</sup> and Lihua Wang<sup>a,b</sup>

<sup>a</sup> Key Laboratory of Organic Synthesis of Jiangsu Province, School of Chemistry, Chemical Engineering and Materials Science, Soochow University (DuShuHu Campus), 199 Renai Road, Suzhou, 215123, China

<sup>b</sup> Key Laboratory of Energy-saving and Environmental protection materials Test and Technical service center of Jiangsu Province, Soochow University (DuShuHu Campus), 199 Renai Road, Suzhou, 215123, China. Fax: +86 (0) 512-6588 0367; Tel: +86 (0) 512-6588 0368. E-mail: [lujm@suda.edu.cn](mailto:lujm@suda.edu.cn), [xuqingfeng@suda.edu.cn](mailto:xuqingfeng@suda.edu.cn);

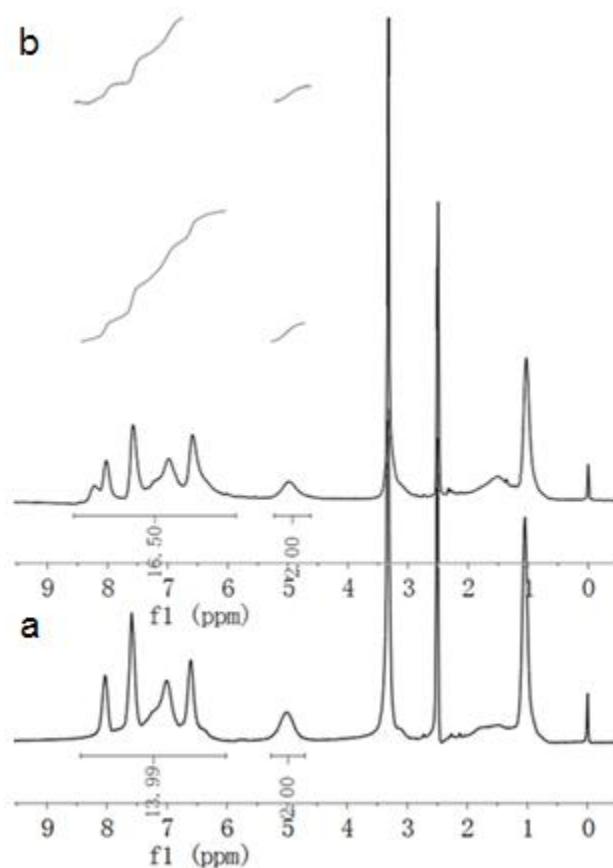

Fig. S1. <sup>1</sup>H NMR spectra in DMSO-*d*<sub>6</sub> of PStCH (a) and PStCH-*b*-P4VP (b).

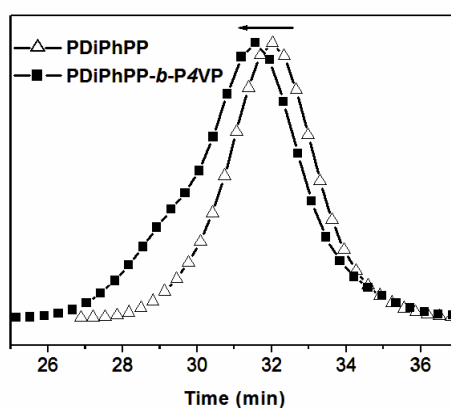

Fig. S2. GPC traces of PStCH ( $M_n = 10530$ , PDI = 1.10) and PStCH-*b*-P4VP ( $M_n = 12170$ , PDI = 1.19).

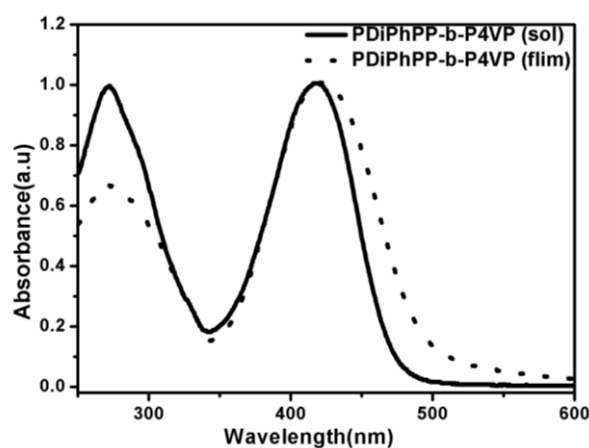

Fig. S3. UV-vis absorption spectra of PStCH-*b*-P4VP in (a) DMF solution and (b) spin coated from 1,2-dichloroethane.

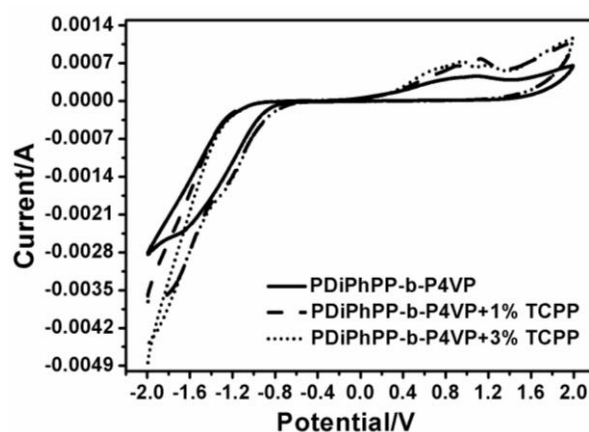

Fig. S4. Cyclic voltammograms of PStCH-*b*-P4VP and TCPP: PStCH-*b*-P4VP on a ITO electrode in 0.1 M TBAP/ $\text{CH}_3\text{CN}$  solution with Ag/AgCl as reference electrode and Pt wire as counter electrode. A scan rate of 100 mV/s was used.

The conducting cyclic voltammetry (CV) measurements was investigates in 0.1 M acetonitrile

solution of tetrabutylammonium hexafluorophosphate, with the auxiliary electrode of Pt, reference electrode of Ag/AgCl and working electrode of the ITO glass coated with a polymer film. The  $E_{\text{Foc}}$  is 0.43 eV from the CV measurement with bare ITO glass substrate without polymer film. The highest occupied molecular orbital (HOMO) and lowest unoccupied molecular orbital (LUMO) energy levels can be calculated from the cyclic voltammetry (CV) results, according to the following equations:

$$\text{HOMO (eV)} = -[(E_{\text{Ox}}(\text{onset}) - E_{\text{Foc}}) + 4.80]$$

$$\text{LUMO (eV)} = \text{HOMO} + E_{\text{g}}$$

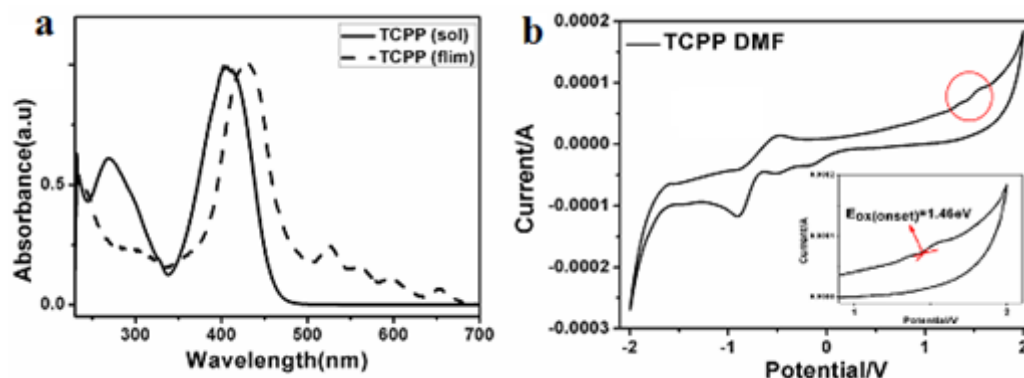

Fig. S5. (a) UV-vis absorption spectra of TCPP in DMF solution and spin coated from 1,2-dichloroethane; (b) Cyclic voltammograms of TCPP in DMF with 0.1M of n-Bu<sub>4</sub>NPF<sub>6</sub> as the supporting electrolyte.

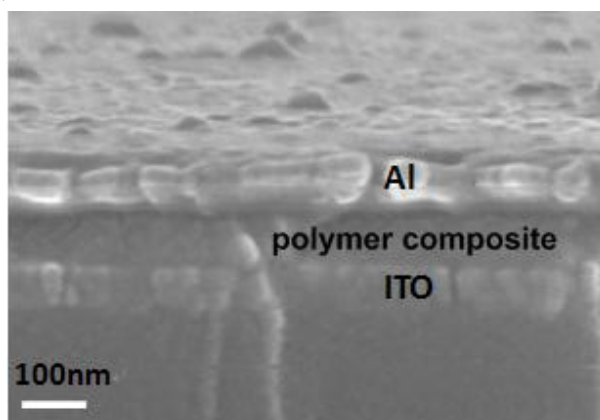

Fig. S6. SEM images of the cross-section of the memory device.

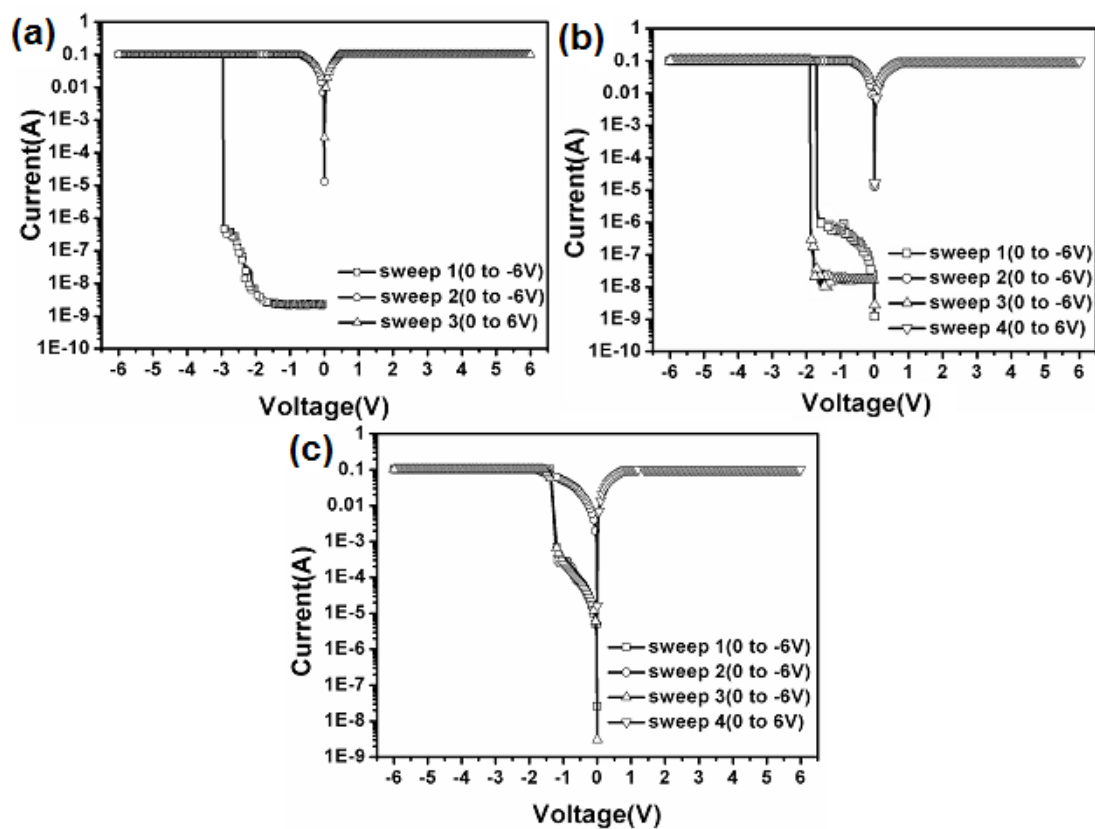

Fig. S7 (a-c) Current-voltage (I-V) characteristics of the PStCH-*b*-P4VP and TCPP: PStCH-*b*-P4VP composites memory devices based on Au-Au electrode. The content of TCPP: (a) 0%; (b) 1% and (c) 3%.
